# Supplementary material for: The role of pre-defined microporosity in catalytic site formation for the oxygen reduction reaction in iron- and nitrogen-doped carbon materials
Source: Royal Society of Chemistry journal article supplement (doi:10.1039/c6ta10679j), 2017-01-01
Supplement: c6ta10679j1.pdf [file c6ta10679j1.pdf]

## Supporting Information

### **The Role of Pre-Defined Microporosity in Catalytic Site Formation for Oxygen Reduction Reaction in Iron- and Nitrogen-Doped Carbon Materials**

Minhyoung Kim,<sup>\*ab</sup> Hee Soo Kim,<sup>\*c</sup> Sung Jong Yoo,<sup>de</sup> Won Cheol Yoo<sup>\*cf</sup> and Yung-Eun Sung<sup>\*ab</sup>

<sup>a</sup> Center for Nanoparticle Research, Institute for Basic Science (IBS), Seoul 08826, Republic of Korea. \*E-mail: ysung@snu.ac.kr

<sup>b</sup> School of Chemical and Biological Engineering, Seoul National University, Seoul 08826, Republic of Korea.

<sup>c</sup> Department of Applied Chemistry, Hanyang University, Ansan 15588, Republic of Korea. \*E-mail: wcyoo@hanyang.ac.kr

<sup>d</sup> Fuel Cell Research Center, Korea Institute of Science and Technology (KIST), Seoul 02792, Republic of Korea.

<sup>e</sup> Clean Energy and Chemical Engineering, Korea University of Science and Technology, Daejeon 34113, Republic of Korea.

<sup>f</sup> Department of Chemical and Molecular Engineering, Hanyang University, Ansan 15588, Republic of Korea.

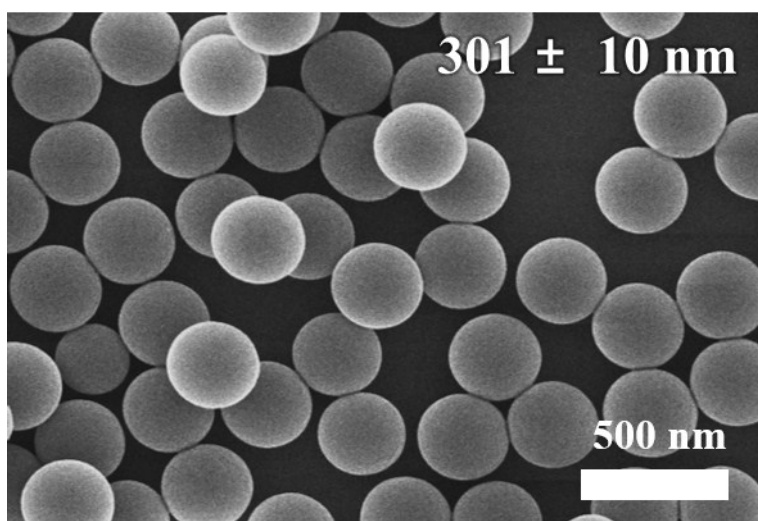

**Fig. S1.** SEM images of the RFP sample.

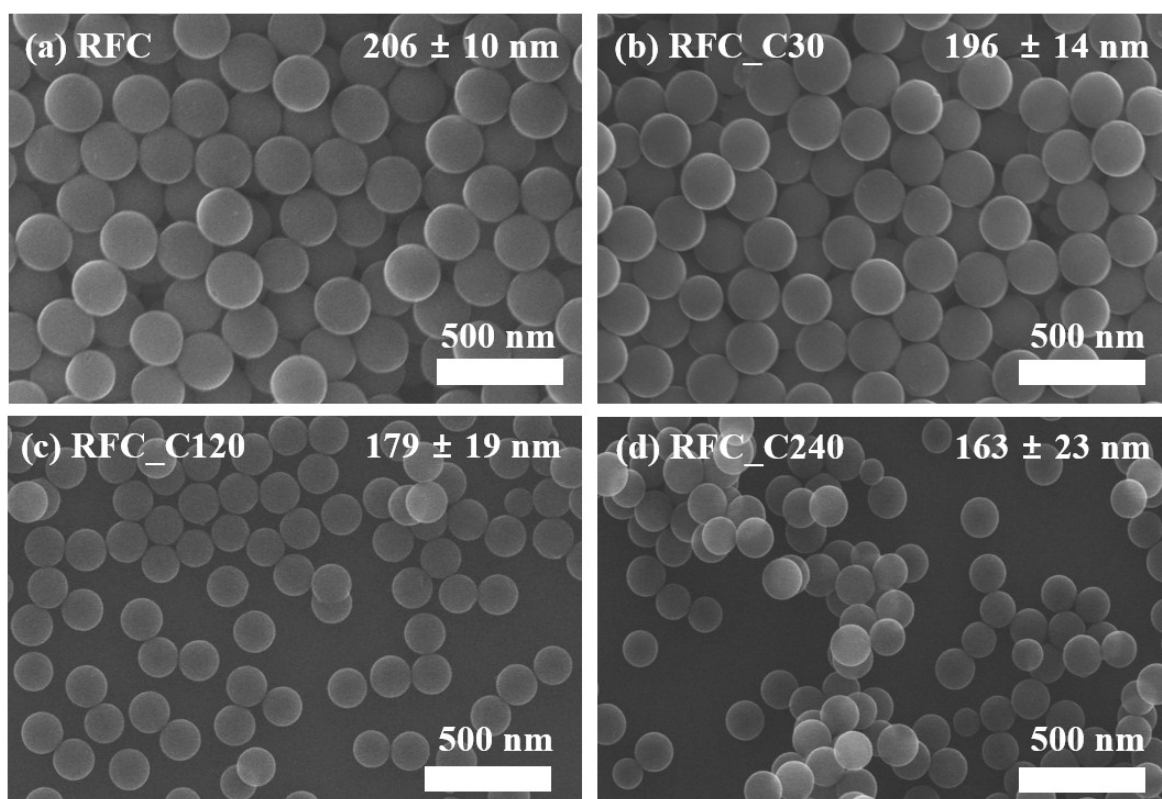

**Fig. S2.** SEM images of the RFC\_CX series.

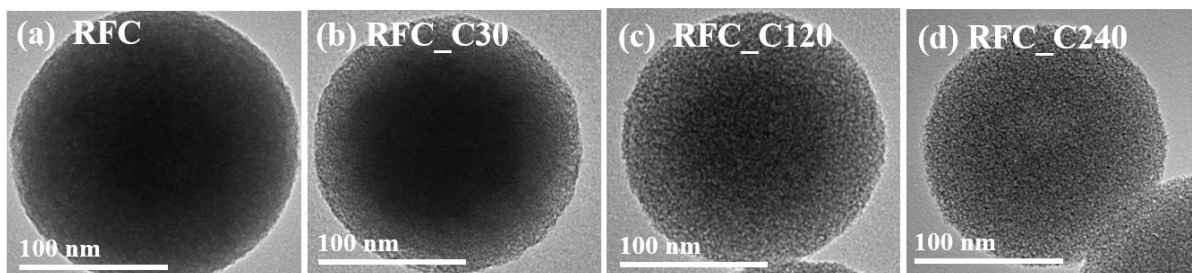

**Fig. S3.** TEM images of the RFC\_CX series.

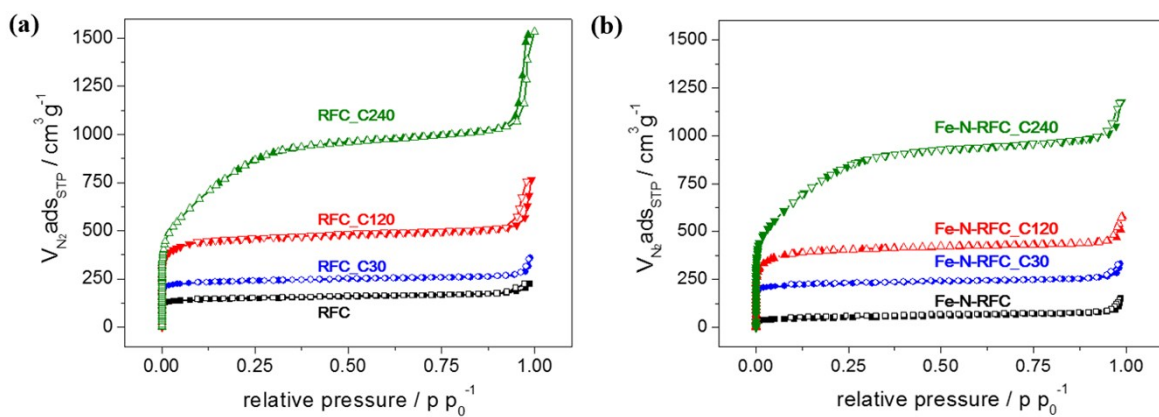

**Fig. S4.** Nitrogen adsorption-desorption isotherms for (a) RFC\_CXs and (b) Fe-N-RFC\_CXs.

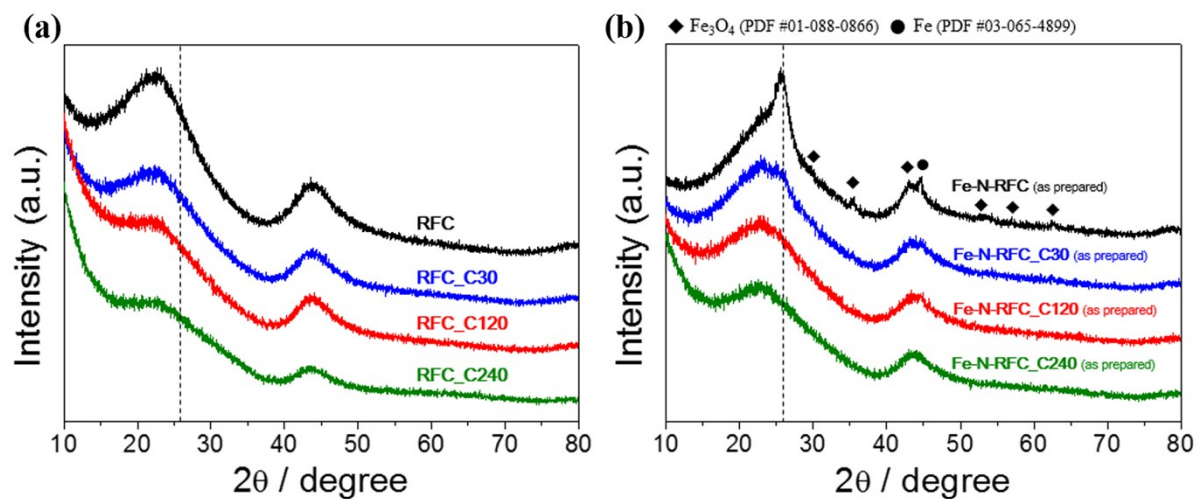

**Fig. S5.** XRD patterns for (a) RFC\_CX and (b) as-prepared Fe-N-RFC\_CX; before acid leaching step.

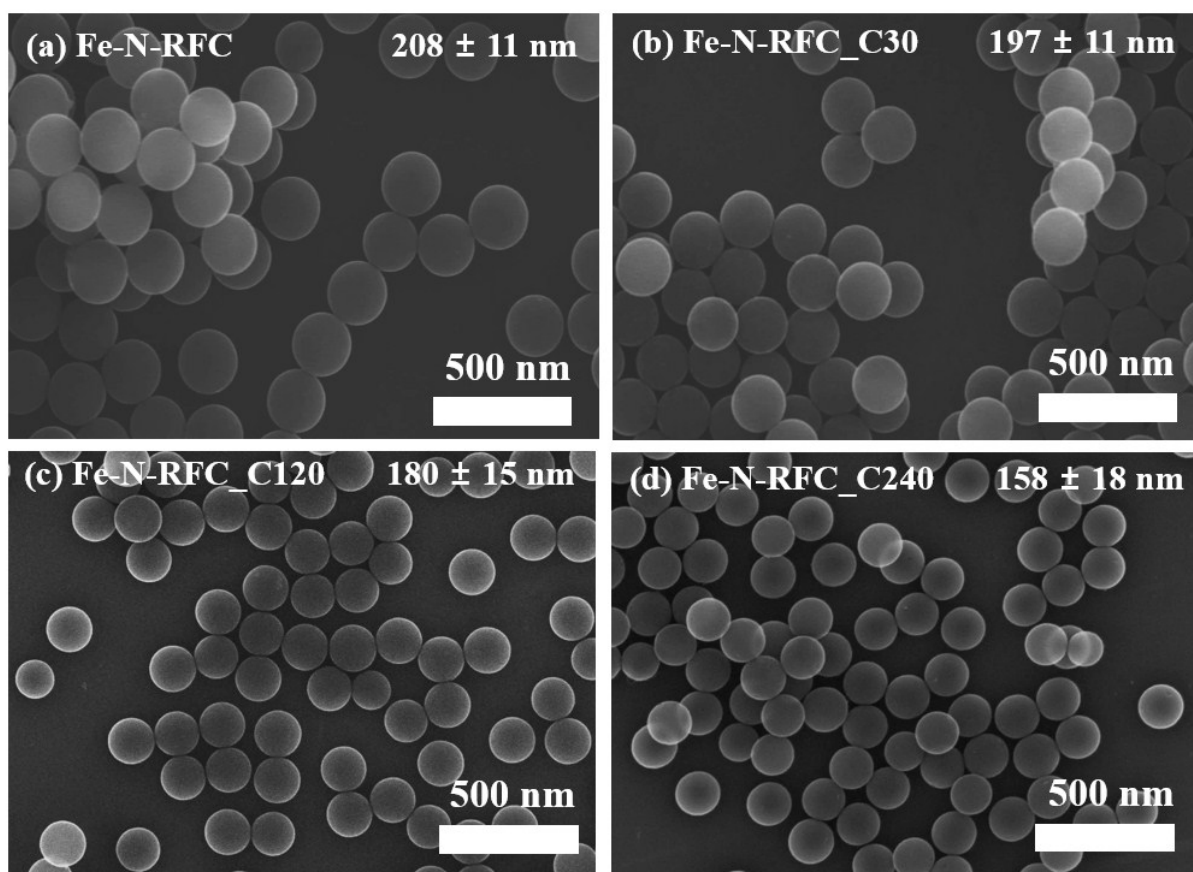

**Fig. S6.** SEM images of the Fe-N-RFC\_CX series.

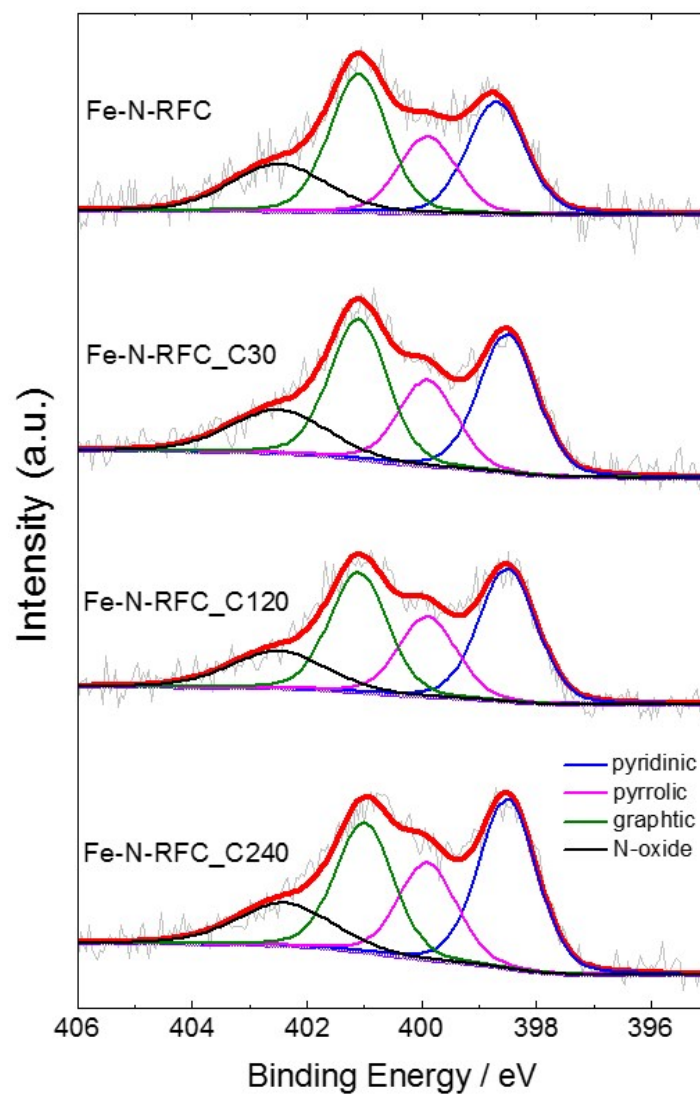

**Fig. S7.** XPS N1s peaks and fitting results for Fe-N-RFC\_CX samples.



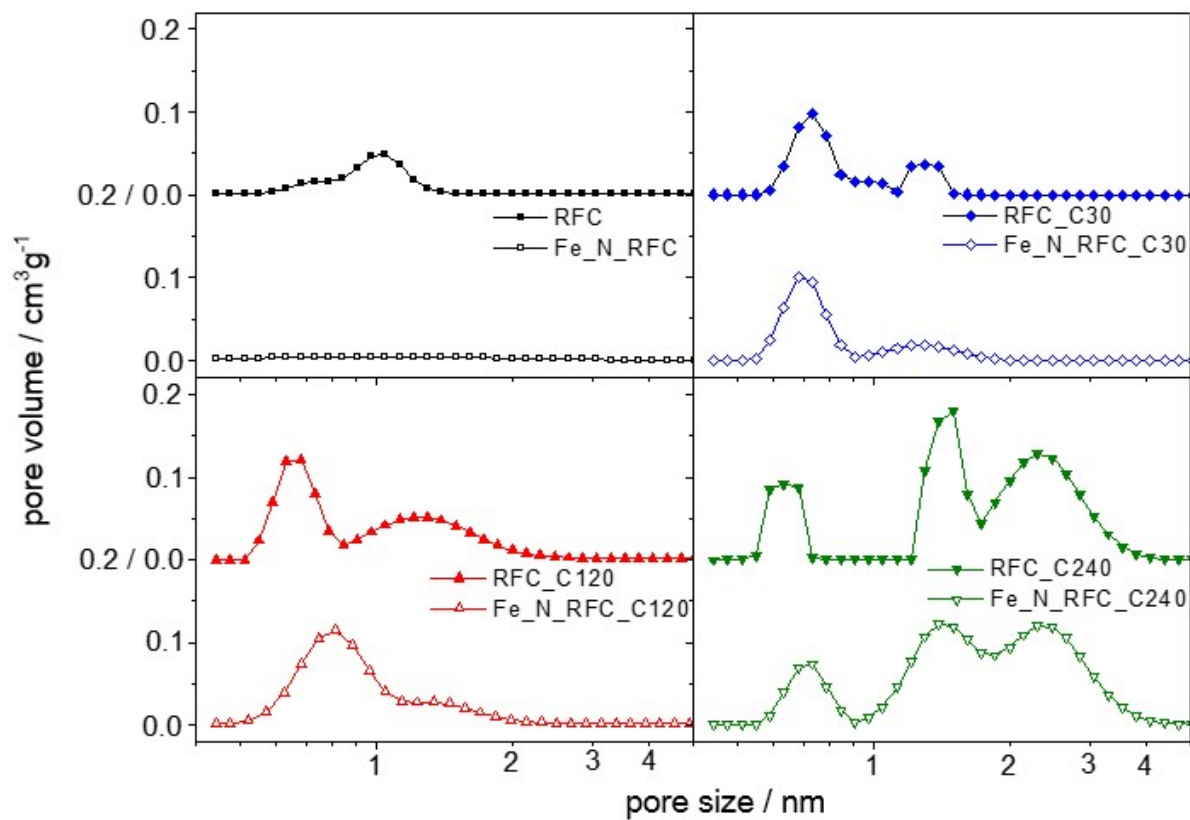

**Fig. S8.** Comparative BET isotherm analyses on incremental pore volume as the function of pore size in samples before/after Fe-N-doping process

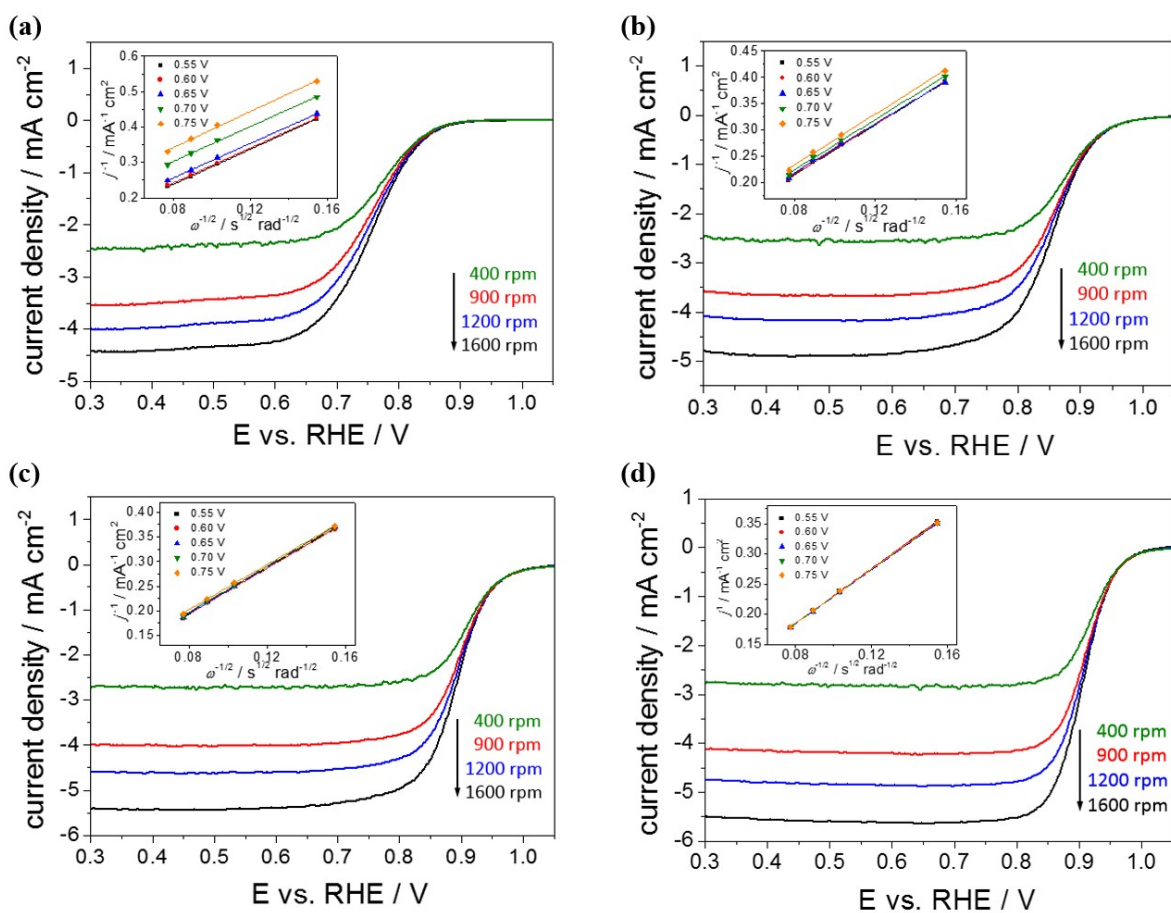

**Fig. S9.** RDE polarization curves for (a) Fe-N-RFC (b) Fe-N-RFC\_C30 (c) Fe-N-RFC\_C120 and (d) Fe-N-RFC\_C240 in O<sub>2</sub>-saturated 0.1 M KOH at a scan rate of 5 mV sec<sup>-1</sup> with various electrode rotating rates (inset) Koutecky-Levich plot of  $J^{-1}$  vs  $\omega^{1/2}$  at 0.55, 0.60, 0.65, 0.70 and 0.75 V vs RHE.

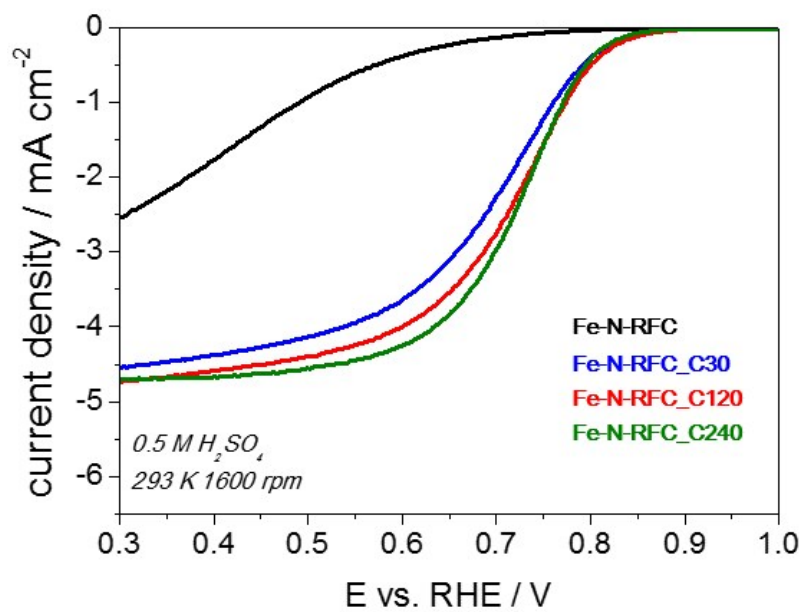

**Fig. S10.** RDE polarization curves of Fe-N-RFC\_CX in O<sub>2</sub>-saturated 0.5 M H<sub>2</sub>SO<sub>4</sub> with a scan rate of 5 mV sec<sup>-1</sup>, 1600 rpm

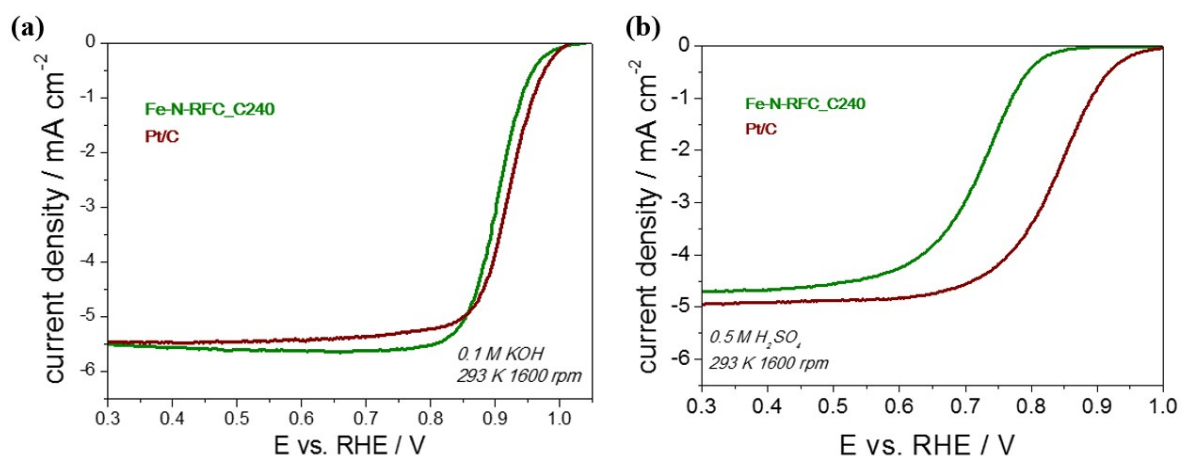

**Fig. S11.** RDE polarization curves of Fe-N-RFC\_C240 and commercial Pt/C 20wt% catalyst in O<sub>2</sub>-saturated (a) 0.1 M KOH and (b) 0.5 M H<sub>2</sub>SO<sub>4</sub>. Pt loading: 0.06 mg cm<sup>-2</sup>.

| Sample        | relative N site (%) |          |           |         |
|---------------|---------------------|----------|-----------|---------|
|               | pyridinic           | pyrrolic | graphitic | N-oxide |
| Fe-N-RFC      | 27.7                | 18.9     | 34.0      | 19.4    |
| Fe-N-RFC_C30  | 31.7                | 19.7     | 32.0      | 16.6    |
| Fe-N-RFC_C120 | 33.6                | 20.3     | 30.3      | 15.8    |
| Fe-N-RFC_C240 | 36.2                | 20.8     | 27.8      | 15.2    |

**Table S1.** Relative N sites for Fe-N-RFC\_CXs from the fitting results of XPS N1s peaks

| Catalysts                              | Loading amounts (mg cm <sup>-2</sup> ) | Half-wave potential (V vs. RHE) | On-set potential (V vs. RHE) | Rotating speed (rpm) | Reference |
|----------------------------------------|----------------------------------------|---------------------------------|------------------------------|----------------------|-----------|
| Co <sub>3</sub> O <sub>4</sub> /N-rmGO | 0.10                                   | 0.83                            | ca. 0.90                     | 1600                 | 1         |
| NG/Fe <sub>5.0</sub>                   | 0.05                                   | -                               | -0.04 V (vs. Ag/AgCl)        | 1600                 | 2         |
| FePc-Py-CNTs                           | 0.32                                   | 0.915                           | -                            | -                    | 3         |
| N-Fe-CNT/CNP                           | 0.20                                   | 0.87±0.01                       | 0.99                         | 900                  | 4         |
|                                        | 1.00                                   | 0.93                            | 1.05                         |                      |           |
| Fe <sub>3</sub> C/C-800                | 0.60                                   | 0.83                            | 1.05                         | 900                  | 5         |
| Fe-N/C-800                             | 0.10                                   | 0.809                           | 0.923                        | 1600                 | 6         |
| Fe-PANI/C-Mela                         | 0.51                                   | 0.88                            | 1.01                         | 1600                 | 7         |
| C-COP-P-Co                             | 0.20                                   | ca. 0.80                        | -                            | 1600                 | 8         |
| CNPs                                   | 0.39                                   | 0.92                            | 1.03                         | 900                  | 9         |
| carbon nanoshell                       | 0.10                                   | 0.85                            | 0.98                         | 1600                 | 10        |
| Fe-N-CNFs                              | 0.60                                   | 0.81                            | 0.93                         | 1600                 | 11        |
| GF+N <sub>2</sub> +Fe1_800             | 0.10                                   | 0.846                           | 0.907                        | 1600                 | 12        |
| CoO <sub>x</sub> /Co@GC-NC             | -                                      | 0.858                           | 0.974                        | 1600                 | 13        |
| Fe-N-RFC_C240                          | 0.50                                   | 0.91                            | 0.998                        | 1600                 | This work |

**Table S2.** Summary of reported ORR performance for Fe-N-C catalysts in 0.1 M KOH.

## References

- 1 Y. Liang, Y. Li, H. Wang, J. Zhou, J. Wang, T. Regier, H. Dai, *Nat. Mater.*, 2011, **10**, 780-786.
- 2 K. Parvez, S. Yang, Y. Hernandez, A. Winter, A. Turchanin, X. Feng, K. Müllen, *ACS Nano*, 2012, **6**, 9541-9550.
- 3 R. Cao, R. Thapa, H. Kim, X. Xu, M. G. Kim, Q. Li, N. Park, M. Liu, J. Cho, *Nat. Commun.*, 2013, **4**, 2076.
- 4 H. T. Chung, J. H. Won, P. Zelenay, *Nat. Commun.*, 2013, **4**, 1922.
- 5 Y. Hu, J. O. Jensen, W. Zhang, L. N. Cleemann, W. Xing, N. J. Bjerrum, Q. Li, *Angew. Chem. Int. Ed.*, 2014, **53**, 3675-3679.
- 6 L. Lin, Q. Zhu, A.-W. Xu, *J. Am. Chem. Soc.*, 2014, **136**, 11027-11033.
- 7 H. Peng, F. Liu, X. Liu, S. Liao, C. You, X. Tian, H. Nan, F. Luo, H. Song, Z. Fu, *ACS Catal.*, 2014, **4**, 3797-3805.
- 8 Z. Xiang, Y. Xue, D. Cao, L. Huang, J. F. Chen, L. Dai, *Angew. Chem. Int. Ed.*, 2014, **53**, 2433-2437.
- 9 S. Zhao, H. Yin, L. Du, L. He, K. Zhao, L. Chang, G. Yin, H. Zhao, S. Liu, Z. Tang, *ACS Nano*, 2014, **8**, 12660-12668.
- 10 Y. Wang, A. Kong, X. Chen, Q. Lin, P. Feng, *ACS Catal.*, 2015, **5**, 3887-3893.
- 11 Z. Y. Wu, X. X. Xu, B. C. Hu, H. W. Liang, Y. Lin, L. F. Chen, S. H. Yu, *Angew. Chem.*, 2015, **127**, 8297-8301.
- 12 K. Qiu, G. Chai, C. Jiang, M. Ling, J. Tang, Z. X. Guo, *ACS Catal.*, 2016, **6**, 3558-3568.
- 13 J. Yu, G. Chen, J. Sunarso, Y. Zhu, R. Ran, Z. Zhu, W. Zhou, Z. Shao, *Advanced Science*, 2016, DOI: 10.1002/advs.201600060.
